# Supplementary material for: Molecular dissection of the ILK-PINCH-parvin triad reveals a fundamental role for the ILK kinase domain in the late stages of focal-adhesion maturation
Source: Oxford University Press journal article supplement (doi:10.1242/jcs.044602), 2009-05-13
Supplement: jcs044602-sup-fig_s1.pdf [file jcs044602-sup-fig_s1.pdf]

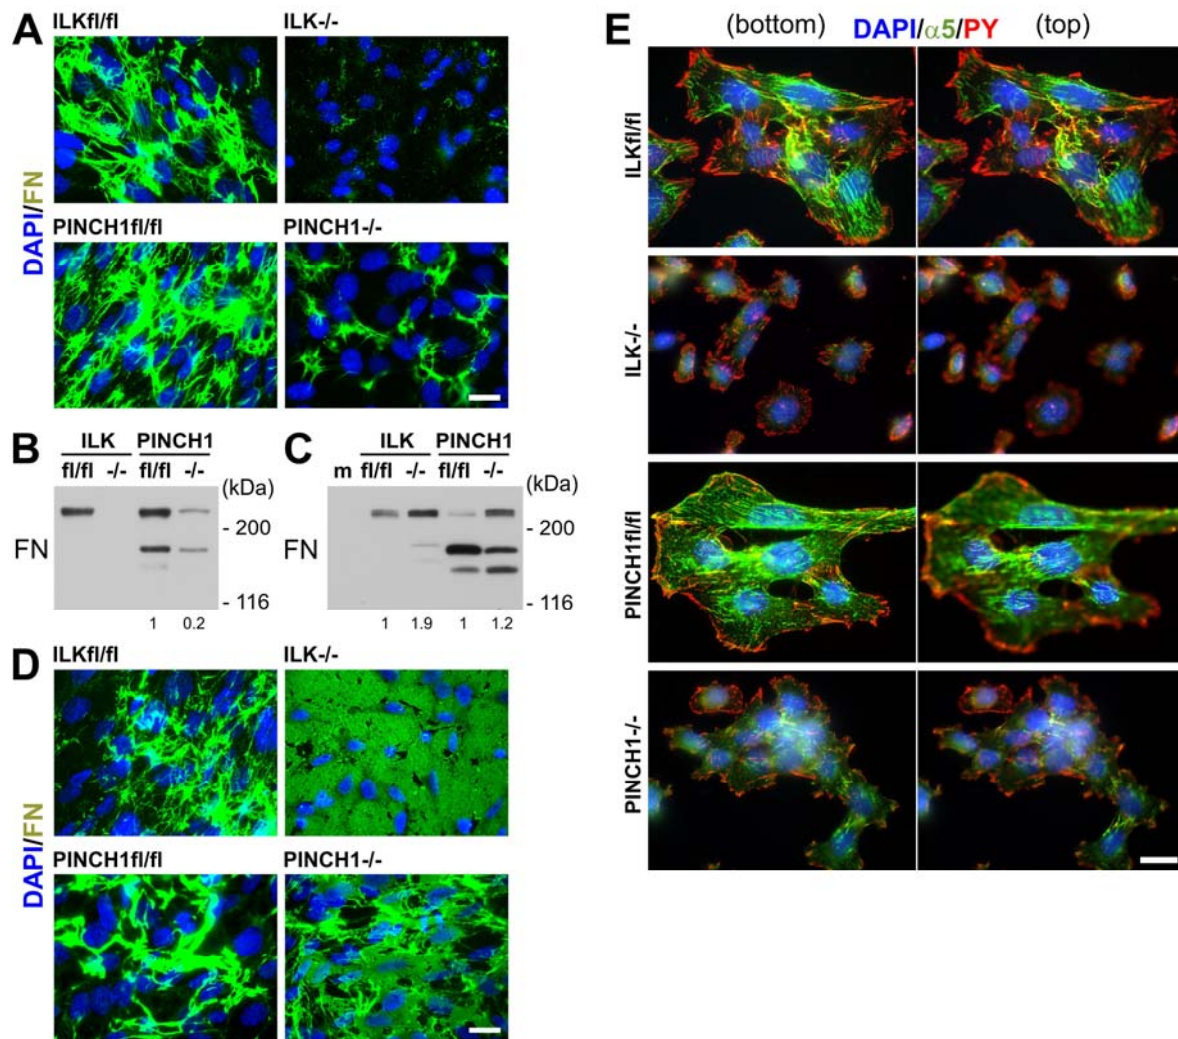

**Fig. S1.** Defective fibronectin assembly due to impaired formation of FB after ILK or PINCH1 deletion. [A] Impact of ILK or PINCH1 deletion on the assembly of endogenous FN, which is detected either by fluorescent staining of non-permeabilized cells cultured on glass coverslips (A) or by western blot analysis of deoxycholate (DOC)-insoluble cell extracts (B). [C] Endogenous FN is however secreted by the knock-out cells and it accumulates in the culture medium; m = control medium. Intensities of the sum of the bands in -/- samples relative to the sum of the bands in fl/fl samples, as determined by densitometry analysis, are indicated below. [D] ILK or PINCH1 deletion impacts also on the ability of the cells to remodel surface-adsorbed FN, as detected by immunofluorescent anti-FN antibody staining of cells cultured on FN-coated coverslips. [E] ILK or PINCH1 deletion impairs FB formation. Cells on coverslips were stained with anti-integrin  $\alpha_5$  (FB marker) and anti-PY (FX and FA marker) antibodies. Images represent the lower surface of cells in contact with the substrate (bottom), or their upper surface (top). All experiments were performed 20 hours after plating the cells. All bars = 20  $\mu$ m.
