# Supplementary material for: Molecular dissection of the ILK-PINCH-parvin triad reveals a fundamental role for the ILK kinase domain in the late stages of focal-adhesion maturation
Source: Oxford University Press journal article supplement (doi:10.1242/jcs.044602), 2009-05-13
Supplement: jcs044602-sup-fig_s2.pdf [file jcs044602-sup-fig_s2.pdf]

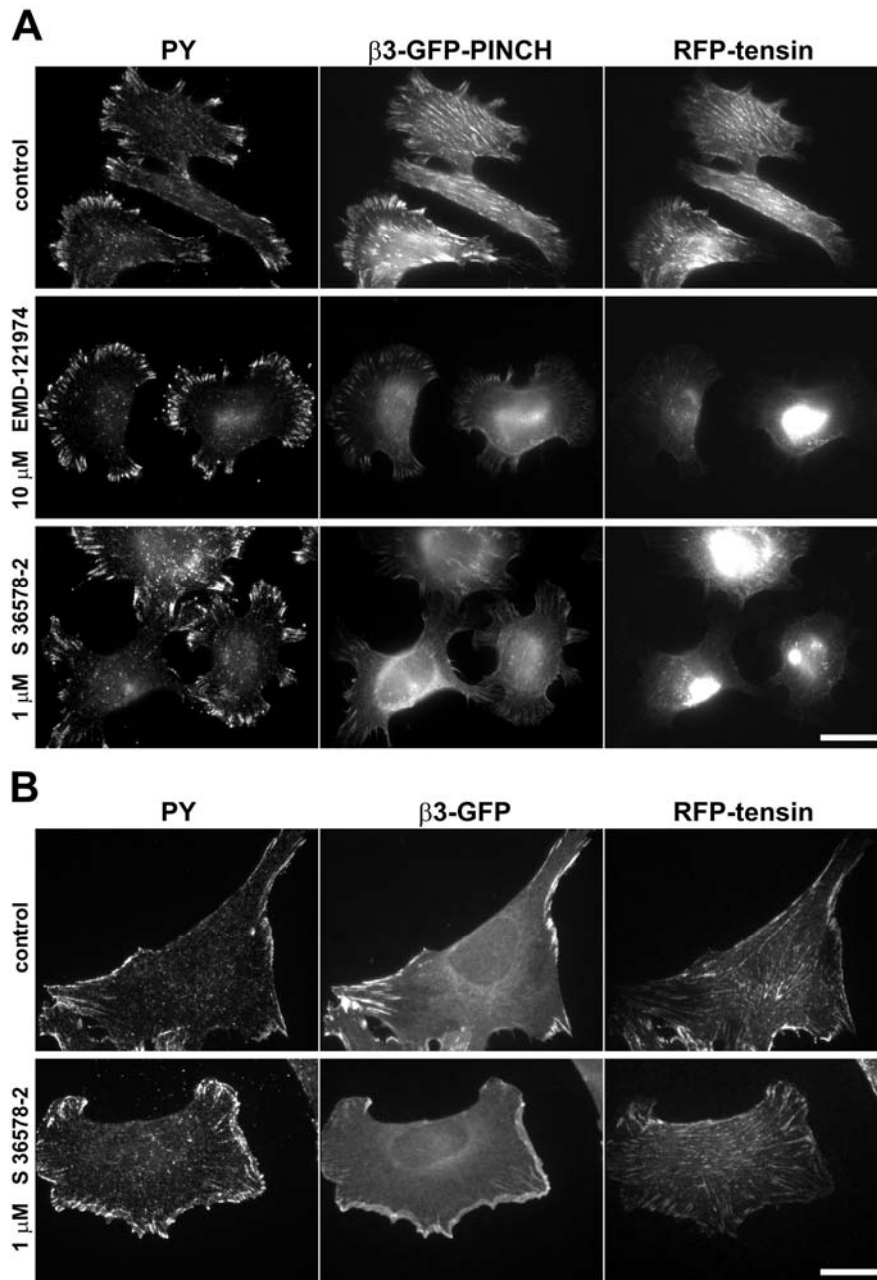

**Fig. S2.** The  $\beta_3$ -GFP-IPP chimera function as  $\alpha_v\beta_3$  heterodimers. [A] Treatment of PINCH1T<sup>-/-</sup> cells expressing  $\beta_3$ -GFP-PINCH with the  $\alpha_v$  integrin-specific inhibitors EMD-121974 or S-36578-2 (identical results were obtained in cells expressing  $\beta_3$ -GFP-ILK and  $\beta_3$ -GFP-parvin). [B] Analogous treatment in PINCH1fl/fl cells. All cells were suspended in medium in absence or presence of the inhibitor, plated on coverslips coated with 50 ng/ml vitronectin + 500 ng/ml FN, fixed and stained with anti-PY antibody. Bars = 20  $\mu$ m.
