# Supplementary material for: Molecular dissection of the ILK-PINCH-parvin triad reveals a fundamental role for the ILK kinase domain in the late stages of focal-adhesion maturation
Source: Oxford University Press journal article supplement (doi:10.1242/jcs.044602), 2009-05-13
Supplement: jcs044602-sup-fig_s4.pdf [file jcs044602-sup-fig_s4.pdf]

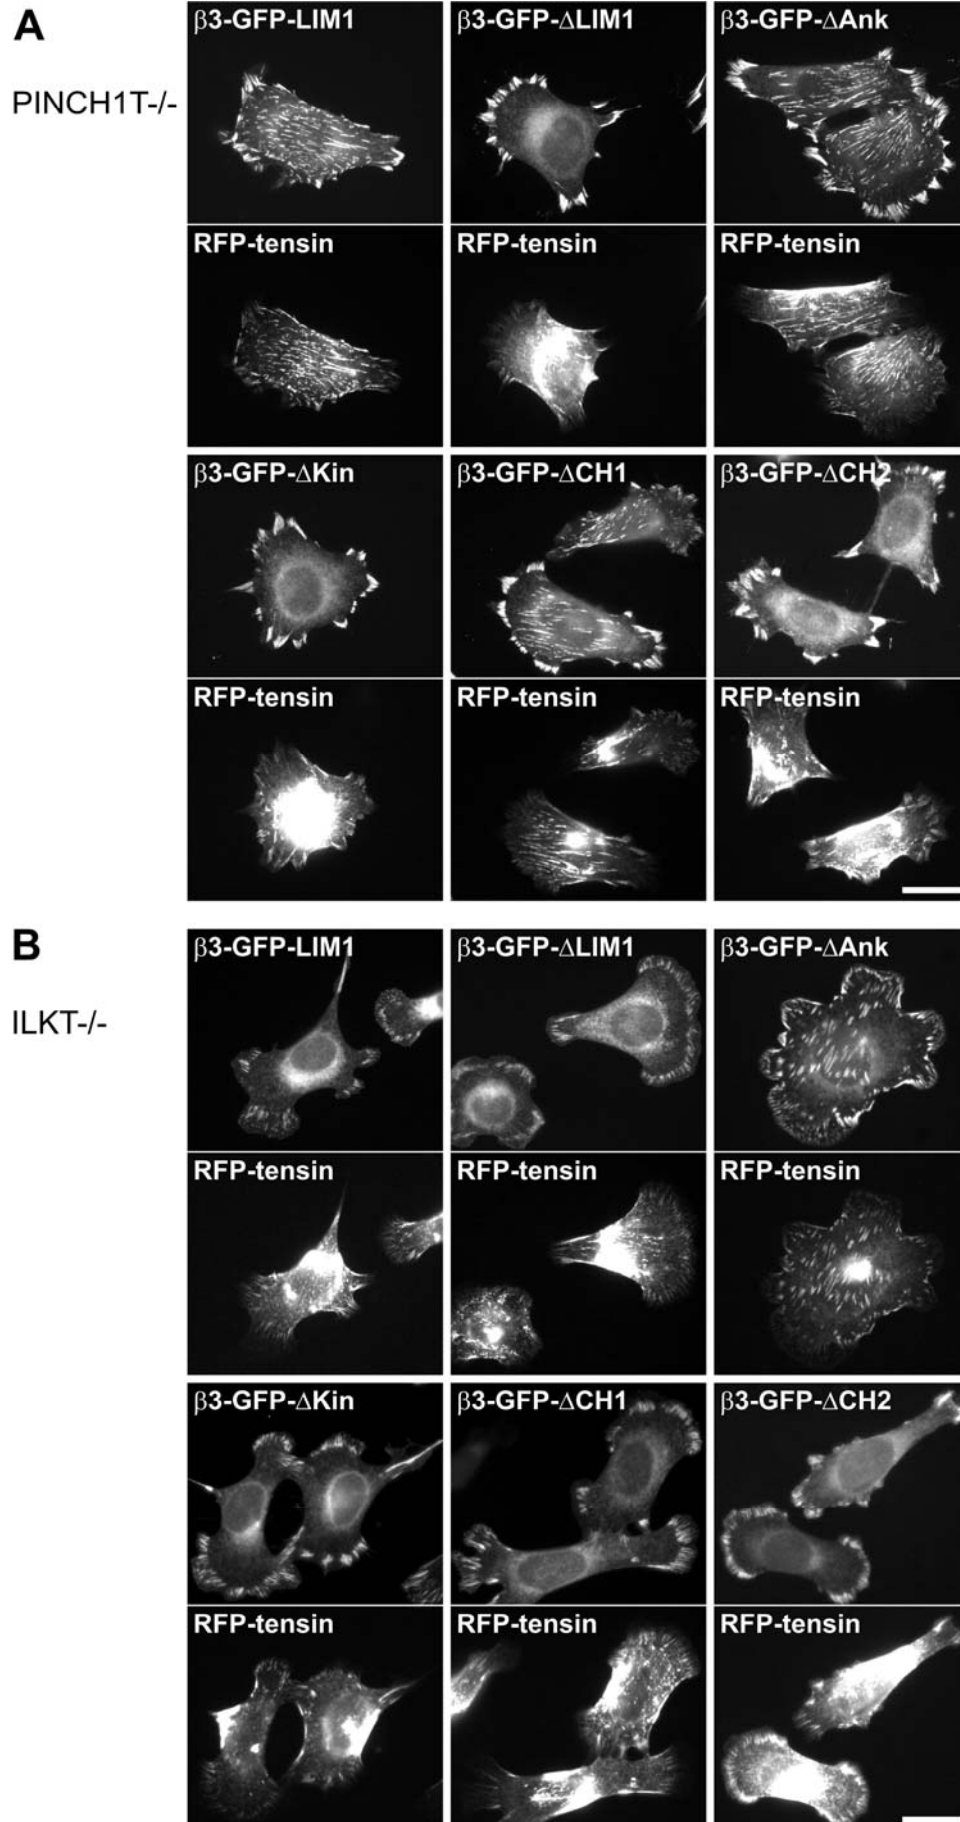

**Fig. S4.** Different effects of the  $\beta_3$ -GFP-IPP chimera deletion mutants on the formation of tensin-rich adhesions in PINCH1-null or ILK-null backgrounds. Representative images of PINCH1T<sup>-/-</sup> cells (A) and ILKT<sup>-/-</sup> cells (B) expressing each  $\beta_3$ -GFP-IPP chimera deletion mutant. Cells were fixed 4 hours after plating on uncoated coverslips. Bars = 20  $\mu$ m.
